# Supplementary material for: Effects of Dietary Energy Sources on Post Mortem Glycolysis, Meat Quality and Muscle Fibre Type Transformation of Finishing Pigs
Source: PLoS One. 2015 Jun 30;10(6):e0131958. doi: 10.1371/journal.pone.0131958 (PMC4488424; doi:10.1371/journal.pone.0131958)
Supplement: S1 Table — (XLSX) [file pone.0131958.s001.xlsx]

## Sheet: growth performance
pens	total initial body weights(kg)	total final body weights(kg)	ADG(kg/d)	total feed intake(kg)	ADFI(kg/d)	FCR(kg/kg)
A1	512.4	700.6	0.840179	639	2.85268	3.39532
A2	531.2	701.4	0.759821	637.2	2.84464	3.74383
A3	521.8	701	0.8	590.1	2.63437	3.29297
B1	533.2	705.2	0.767857	596.3	2.66205	3.46686
B2	493	664.3	0.764732	551.9	2.46384	3.22183
B3	513.1	684.7	0.766071	539.6	2.40893	3.14452
C1	546.8	705.8	0.709821	541.1	2.41562	3.40314
C2	504.6	670.4	0.740179	570.5	2.54688	3.44089
C3	525.7	688.1	0.725	500.5	2.23438	3.0819
