# Supplementary material for: Effects of Dietary Energy Sources on Post Mortem Glycolysis, Meat Quality and Muscle Fibre Type Transformation of Finishing Pigs
Source: PLoS One. 2015 Jun 30;10(6):e0131958. doi: 10.1371/journal.pone.0131958 (PMC4488424; doi:10.1371/journal.pone.0131958)
Supplement: S2 Table — (XLSX) [file pone.0131958.s002.xlsx]

## Sheet: carcass traits
pigs	final live weight (kg)	carcass weight (kg)	carcass yield (%)	Back fat (mm)
A1	94	70	74.4681	20
A2	88	63	71.5909	18
A3	88.5	64.5	72.8814	18.2
A4	97	73.3	75.567	21.6
A5	93	68.5	73.6559	19.1
A6	97.5	74.2	76.1026	21.8
A7	90	65.7	73	20
A8	88	62.7	71.25	17.6
B1	93	67.4	72.4731	18.7
B2	95.5	69.6	72.8796	19.9
B3	87	62.4	71.7241	18
B4	96	72.2	75.2083	20.9
B5	88	63.1	71.7045	17.9
B6	88	62.4	70.9091	17
B7	96.5	73.3	75.9585	21.3
B8	90.5	65.5	72.3757	19
C1	91.5	66.5	72.6776	16.8
C2	88	64.3	73.0682	17.5
C3	87	63.3	72.7586	17.1
C4	88	64	72.7273	18
C5	96.5	71.6	74.1969	19.5
C6	95	69.9	73.5789	18
C7	89	64.8	72.809	16.8
C8	87	63.2	72.6437	16.2
