# Supplementary material for: Effects of Dietary Energy Sources on Post Mortem Glycolysis, Meat Quality and Muscle Fibre Type Transformation of Finishing Pigs
Source: PLoS One. 2015 Jun 30;10(6):e0131958. doi: 10.1371/journal.pone.0131958 (PMC4488424; doi:10.1371/journal.pone.0131958)
Supplement: S3 Table — (XLSX) [file pone.0131958.s003.xlsx]

## Sheet: muscle glycolytic potential
pigs	lactate (μmol/g)	glycogen (μmol/g)	GP (μmol/g)
A1	78.4	11.8	102
A2	70.4	18.3	107
A3	73	15.3	103.6
A4	76.9	12	100.9
A5	74.3	16.8	107.9
A6	78	12.9	103.8
A7	78.3	13.6	105.5
A8	67.7	14.9	97.5
B1	69.9	10.4	90.7
B2	72.4	14	100.4
B3	67.3	18.5	104.3
B4	73.8	13	99.8
B5	75	17.6	110.2
B6	78	11.8	101.6
B7	73	14.9	102.8
B8	64	15.4	94.8
C1	62.4	17.8	98
C2	66.9	12.2	91.3
C3	70.1	10	90.1
C4	71.6	16.2	104
C5	70.9	15.8	102.5
C6	77.1	11	99.1
C7	64.9	11.1	87.1
C8	63.3	18	99.3
