# Supplementary material for: Effects of Dietary Energy Sources on Post Mortem Glycolysis, Meat Quality and Muscle Fibre Type Transformation of Finishing Pigs
Source: PLoS One. 2015 Jun 30;10(6):e0131958. doi: 10.1371/journal.pone.0131958 (PMC4488424; doi:10.1371/journal.pone.0131958)
Supplement: S4 Table — (XLSX) [file pone.0131958.s004.xlsx]

## Sheet: meat quality
pigs	pH45min	pH24h	lightness (L*)	redness (a*)	yellowness (b*)	drip loss (%)	cooking loss (%)	shear force (N)
A1	6.29	5.6	40.9	6.51	1.37	2.03	27.8	42.2
A2	6.3	5.56	42.9	5.81	1.24	2.17	26	21.9
A3	6.42	5.58	44.1	5.1	2.11	1.97	30.2	37.2
A4	6.33	5.57	43.8	5.76	2.06	1.8	27	24
A5	6.07	5.68	45.8	5.15	1.63	2.19	28.9	34.8
A6	6.19	5.4	42.3	5.07	1.83	2.1	26.4	44.3
A7	6.32	5.66	43.6	6.23	1.4	2.14	28.6	32.6
A8	6.4	5.64	43.8	5.15	1.66	2	23.2	38.4
B1	6.47	5.61	44.1	6.6	1.91	1.95	25.8	32.9
B2	6.24	5.58	42.4	5.32	1.38	1.9	31.9	17.9
B3	6.49	5.57	43.6	5.94	1.64	2.17	28.7	41.6
B4	6.43	5.66	42.8	5.53	1.78	1.76	27.9	43.7
B5	6.37	5.54	43.9	6.31	1.64	2.02	23	45.8
B6	6.32	5.5	43	5.05	1.57	1.82	24.5	37.5
B7	6.39	5.59	44.5	5.64	1.51	2.03	24.7	35.9
B8	6.45	5.62	41.9	5.89	1.79	1.93	29.3	37.2
C1	6.33	5.65	41.5	6.26	1.79	2	25.7	32.3
C2	6.48	5.58	43.6	5.05	2.63	1.8	29.8	37.1
C3	6.36	5.54	43.5	6.19	1.71	1.73	23.9	49.2
C4	6.43	5.57	43.8	6.68	1.46	1.8	29	40.5
C5	6.38	5.52	45.7	5.45	1.83	1.88	24.9	39
C6	6.3	5.55	40	5.59	2.1	1.79	28.4	21.7
C7	6.46	5.64	45.5	6.13	1.85	2.13	27.3	42.1
C8	6.63	5.79	42.1	5.63	1.56	1.7	26	34.6
