# Supplementary material for: Effects of Dietary Energy Sources on Post Mortem Glycolysis, Meat Quality and Muscle Fibre Type Transformation of Finishing Pigs
Source: PLoS One. 2015 Jun 30;10(6):e0131958. doi: 10.1371/journal.pone.0131958 (PMC4488424; doi:10.1371/journal.pone.0131958)
Supplement: S5 Table — (XLSX) [file pone.0131958.s005.xlsx]

## Sheet: MyHC isoform genes expression
pigs	MyHC I	MyHC IIa	MyHC IIx	MyHC IIb
A1	0.889459	0.84998	0.934004	1.05373
A2	1.31358	1.15389	1.15589	0.885768
A3	0.955614	0.779975	1.06511	0.895956
A4	1.304	1.05166	1.05275	1
A5	0.890431	1.1932	0.899898	1.20025
A6	1.06831	0.921997	0.985435	1.24776
A7	0.972655	1.1088	0.842647	1.02438
A8	0.885564	1.01936	1.1028	0.922316
B1	1.02101	1.25614	1.13171	1.165
B2	1.49071	0.894715	0.72749	0.95396
B3	1.46951	1.32256	0.989542	1.03946
B4	1.06044	1.06155	0.800607	0.629524
B5	1.15615	0.936489	0.959818	1.06733
B6	1.10637	1.033	0.874078	0.911722
B7	1.34599	1.24718	1.08611	1.20247
B8	1.1483	0.782954	0.841771	0.760489
C1	1.05081	1.34443	0.730522	0.783226
C2	1.23971	1.36084	0.691116	0.503478
C3	1.58227	1.44593	0.621359	0.612805
C4	1.61664	1.34723	0.523405	0.759699
C5	1.27368	1.37841	0.746131	0.694638
C6	1.64947	1.62169	0.707842	0.796364
C7	1.51239	1.24948	0.488806	0.729932
C8	1.41814	1.51414	0.753667	0.828745
