# Supplementary material for: Effects of Dietary Energy Sources on Post Mortem Glycolysis, Meat Quality and Muscle Fibre Type Transformation of Finishing Pigs
Source: PLoS One. 2015 Jun 30;10(6):e0131958. doi: 10.1371/journal.pone.0131958 (PMC4488424; doi:10.1371/journal.pone.0131958)
Supplement: S7 Table — (XLSX) [file pone.0131958.s007.xlsx]

## Sheet: miR499, Sox6 expressions
pigs	miR499	Sox6
A1	1.21067	0.841407
A2	0.866788	1.03565
A3	0.968395	0.901276
A4	1.06365	1.18485
A5	1.05028	0.904197
A6	1.14619	0.938248
A7	0.852726	1.27991
A8	0.996063	0.989685
B1	1.00826	0.897717
B2	1.54133	1.0051
B3	1.05727	0.859359
B4	1.17596	0.982821
B5	1.00847	1.12792
B6	1.06357	0.80599
B7	1.17448	1.0022
B8	1.3939	0.938221
C1	1.32872	0.773514
C2	1.48041	0.633976
C3	1.25752	0.780245
C4	1.79432	1.03479
C5	1.71011	0.956387
C6	1.46241	0.769237
C7	1.19229	0.8376
C8	1.308	0.889254
