# Supplementary material for: Effects of Dietary Energy Sources on Post Mortem Glycolysis, Meat Quality and Muscle Fibre Type Transformation of Finishing Pigs
Source: PLoS One. 2015 Jun 30;10(6):e0131958. doi: 10.1371/journal.pone.0131958 (PMC4488424; doi:10.1371/journal.pone.0131958)
Supplement: S8 Table — (XLSX) [file pone.0131958.s008.xlsx]

## Sheet: miR208b,Sp3,Thrap1 expressions
pigs	miR208b	Sp3	Thrap1
A1	1.12234	0.988606	1.05324
A2	1.04339	1.23768	1.01748
A3	0.811482	0.866365	1.09126
A4	0.951987	1.04573	1.1042
A5	0.977471	1.06745	0.938004
A6	1.0743	0.809823	0.851847
A7	1.21602	0.913197	1.09809
A8	0.949292	1.10719	0.926053
B1	0.988633	1.00548	1.05873
B2	1.05311	1.00064	1.07587
B3	1.37577	1.15016	1.06585
B4	1.1097	0.775576	1.12207
B5	1.26735	0.934678	0.866537
B6	1.13137	0.911002	0.75245
B7	1.0923	0.812821	0.886791
B8	0.986828	0.782963	0.895646
C1	1.13946	0.682345	0.784584
C2	1.16456	0.728717	1.11111
C3	1.21319	0.804598	0.862144
C4	1.12792	0.665262	0.91067
C5	1.12216	1.02314	0.837794
C6	1.1926	0.627257	0.892856
C7	1.26776	0.939223	1.16285
C8	1.57179	0.815062	1.18591
